# Supplementary material for: Surface acidity enhancement of CeO2 catalysts via modification with a heteropoly acid for the selective catalytic reduction of NO with ammonia
Source: Royal Society of Chemistry journal article supplement (doi:10.1039/c9cy01346f), 2019-01-01
Supplement: c9cy01346f1.pdf [file c9cy01346f1.pdf]

***Supporting Information***

**Surface Acidity Enhancement of CeO<sub>2</sub> Catalysts via Modification  
with a Heteropoly Acid for the Selective Catalytic Reduction of NO  
with Ammonia**

Yu Ke<sup>1</sup>, Wenjun Huang<sup>1\*</sup>, Sichao Li<sup>1</sup>, Yong Liao<sup>1</sup>, Jiaying Li<sup>1</sup>, Zan Qu<sup>1</sup>, Naiqiang Yan<sup>1,2</sup>

1. School of Environmental Science and Engineering, Shanghai Jiao  
Tong University, Shanghai 200240, China;

2. Shanghai Institute of Pollution Control and Ecological Security,  
Shanghai 200092, China.

---

\* Corresponding author, Tel: +86 21 54745591; Fax: +86 21 54745591

E-mail address: hwenjun@sjtu.edu.cn (Wenjun Huang)

## **Table/Figure captions**

**Table S1** Textual properties of the x% HSiW/Ce catalysts

**Table S2** XPS parameters of the series catalysts investigated

**Table S3** Spectrophotometry of HSiW/Ce after SCR reaction at 150 °C for 10 h.

**Fig. S1.** Schematic diagram for SCR evaluation fixed-bed reaction system

**Fig. S2.** Stability test of 10% HSiW/Ce catalyst at 250 °C

**Fig. S3.** SCR performance of m-HSiW/Ce (mechanical mixing CeO<sub>2</sub> and HSiW) and HSiW/Ce

**Fig. S4.** SCR performance of different Keggin-type HPAs

**Fig. S5.** NH<sub>3</sub> conversion of the various catalysts. Conditions: [NH<sub>3</sub>] = [NO] = 500 ppm, [O<sub>2</sub>] = 3 vol.%, N<sub>2</sub> as balance gas, GHSV = 127000 h<sup>-1</sup>

**Fig. S6.** TEM images of (a) CeO<sub>2</sub> and (b) HSiW/Ce

**Fig. S7.** Infrared Spectroscopy of CeO<sub>2</sub>, HSiW and HSiW/Ce

**Fig. S8.** Raman spectra of CeO<sub>2</sub>, HSiW and HSiW/Ce

**Table S1**

Textual properties of the x% HSiW/Ce catalysts

| Samples          | Grain size (nm) | Surface area<br>(m <sup>2</sup> /g) | Pore volume<br>(cc g <sup>-1</sup> ) |
|------------------|-----------------|-------------------------------------|--------------------------------------|
| CeO <sub>2</sub> | 10.7            | 44.05                               | 0.21                                 |
| 1%HSiW/Ce        | 13.1            | 46.12                               | 0.19                                 |
| 5%HSiW/Ce        | 12.8            | 34.25                               | 0.18                                 |
| 10%HSiW/Ce       | 14.3            | 40.15                               | 0.20                                 |
| 20%HSiW/Ce       | 12.3            | 31.28                               | 0.17                                 |

**Table S2**

XPS parameters of the series catalysts investigated

| Samples            | Surface composition (at.%) |       |       | Ce <sup>3+</sup> /Ce <sup>4+</sup> | O <sub>ads</sub> /O <sub>lat</sub> |
|--------------------|----------------------------|-------|-------|------------------------------------|------------------------------------|
|                    | Ce                         | W     | O     |                                    |                                    |
| CeO <sub>2</sub>   | 18.36                      | /     | 53.84 | 0.22                               | 0.58                               |
| HSiW               | /                          | 12.04 | 51.36 | /                                  | 0.35                               |
| 10%HSiW/Ce (fresh) | 13.58                      | 3.54  | 56.30 | 0.19                               | 0.52                               |
| 10%HSiW/Ce (used)  | 14.10                      | 3.60  | 57.64 | 0.18                               | 0.51                               |

**Table S3**

Spectrophotometry of HSiW/Ce after SCR reaction at 150 °C for 10 h.

| Ions                         | Methods                                  | Concentrations mg/L |
|------------------------------|------------------------------------------|---------------------|
| NO <sub>3</sub> <sup>-</sup> | Disulfonic acid phenol spectrophotometry | 0.8650              |
| NO <sub>2</sub> <sup>-</sup> | Diazo coupling spectrophotometry         | 0.8180              |
| NH <sub>4</sub> <sup>+</sup> | Nessler reagent spectrophotometry        | 241                 |

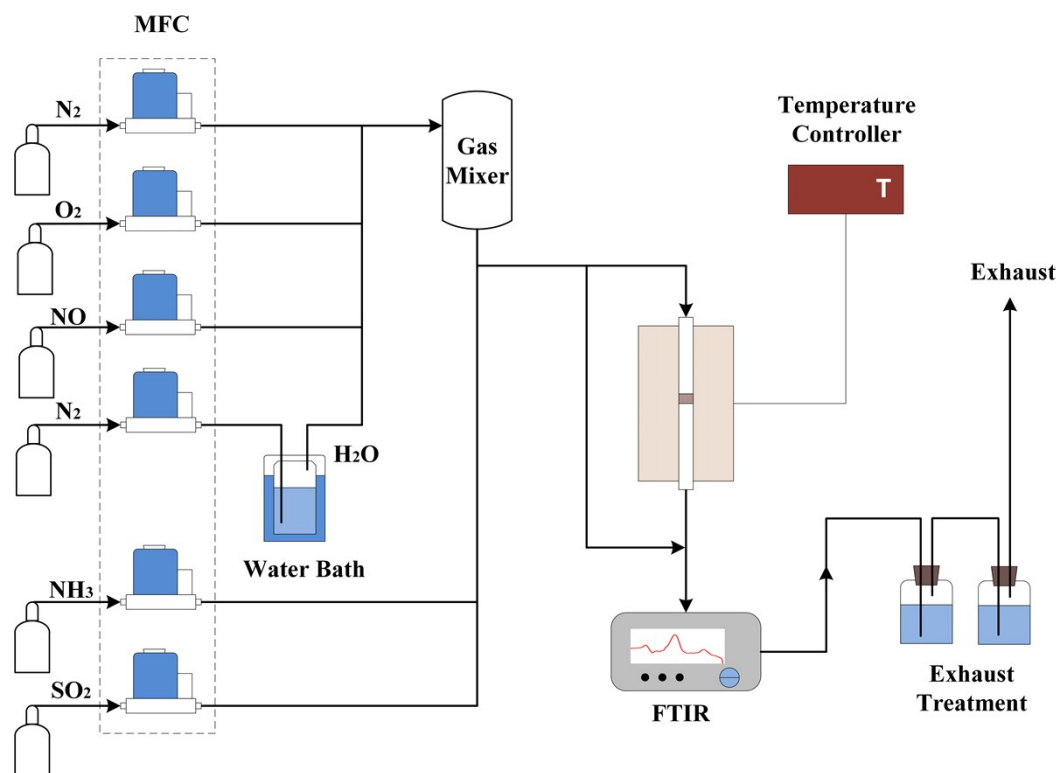

**Fig. S1.** Schematic diagram for SCR evaluation fixed-bed reaction system

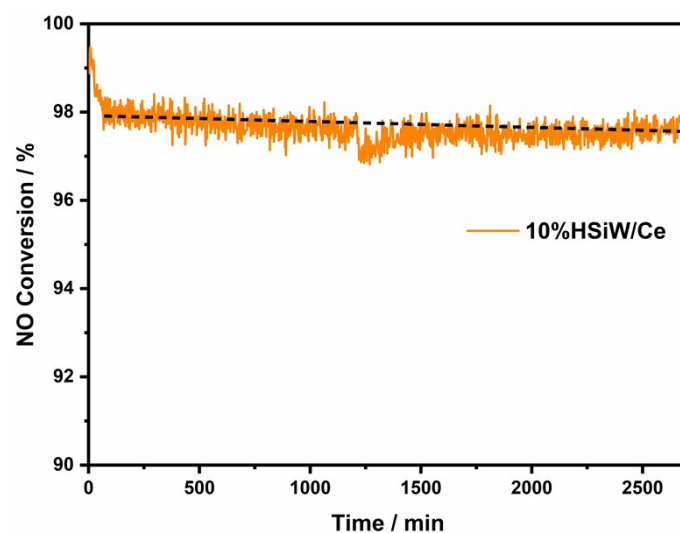

**Fig. S2.** Stability test of 10% HSiW/Ce catalyst at 250 °C

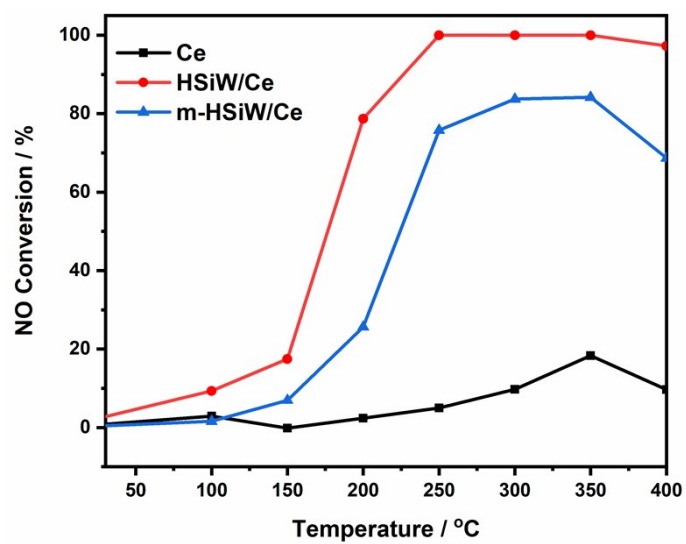

**Fig. S3.** SCR performance of m-HSiW/Ce (mechanical mixing CeO<sub>2</sub> and HSiW) and HSiW/Ce

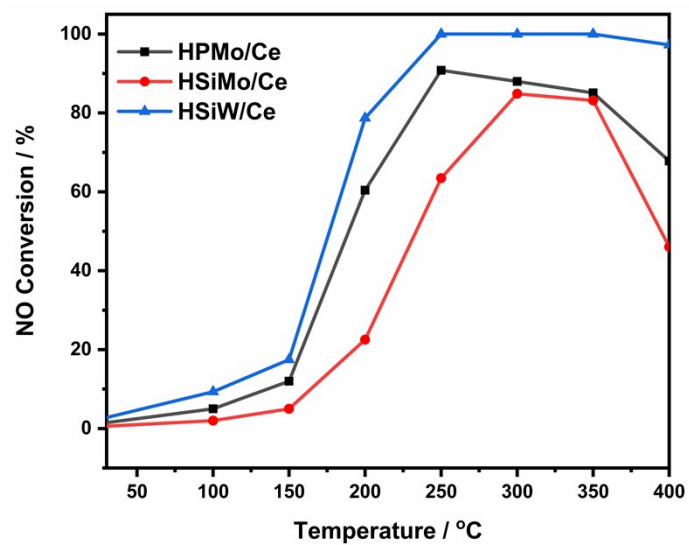

**Fig. S4.** SCR performance of different Keggin-type HPAs

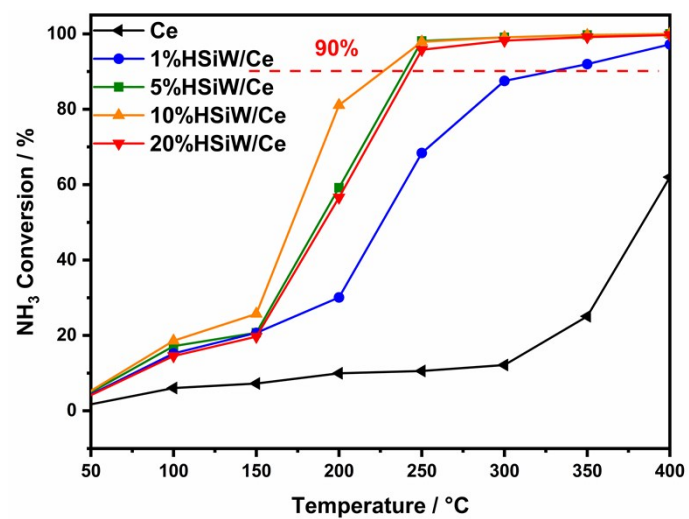

**Fig. S5.** NH<sub>3</sub> conversion of the various catalysts. Conditions: [NH<sub>3</sub>] = [NO] = 500 ppm, [O<sub>2</sub>] = 3 vol.%, N<sub>2</sub> as balance gas, GHSV = 127000 h<sup>-1</sup>

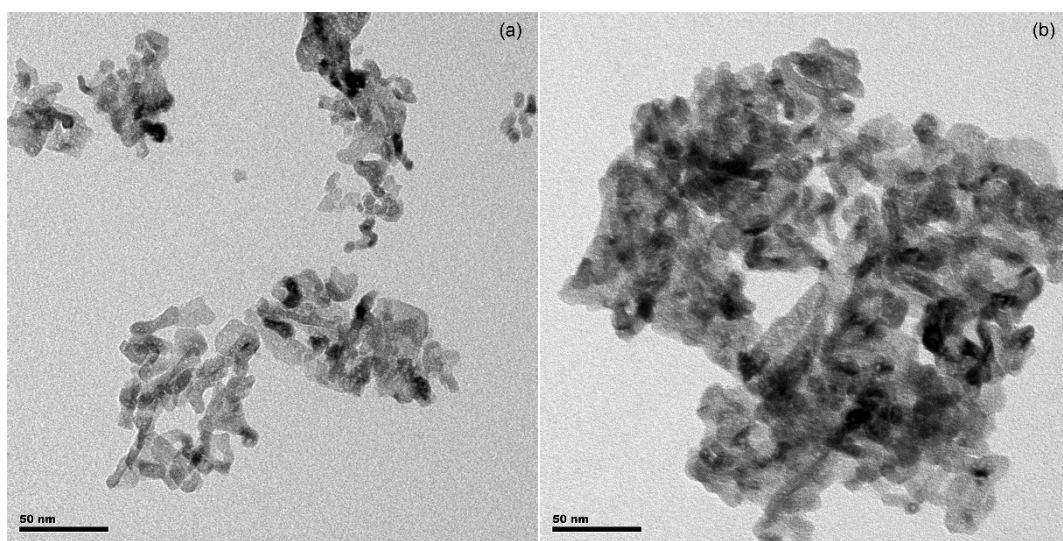

**Fig. S6.** TEM images of (a)  $\text{CeO}_2$  and (b) HSiW/Ce

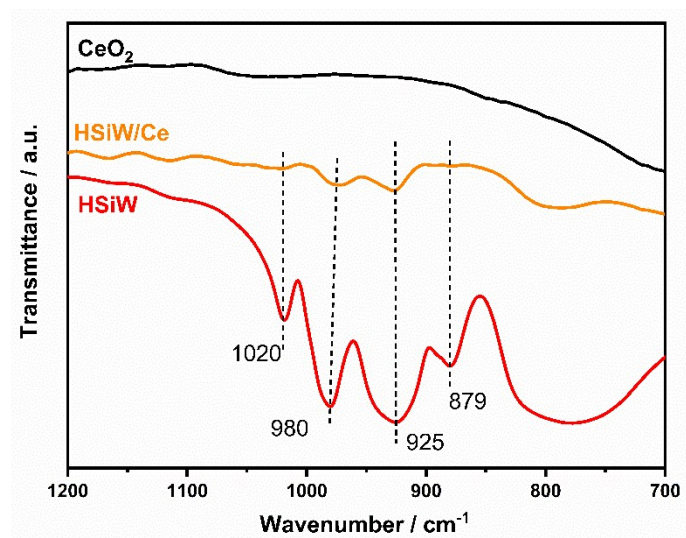

**Fig. S7.** Infrared Spectroscopy of  $\text{CeO}_2$ , HSiW and HSiW/Ce

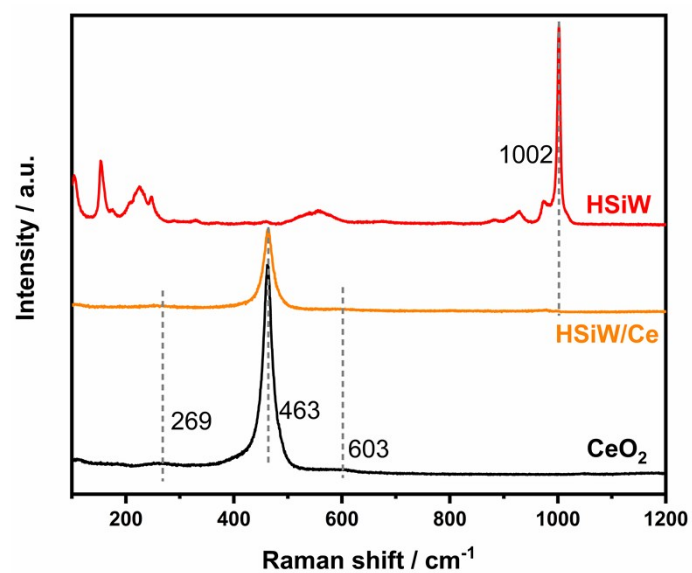

**Fig. S8.** Raman spectra of  $\text{CeO}_2$ , HSiW and HSiW/Ce
